# Supplementary material for: Thermally induced reversible phase transition and photoluminescence switching behavior of (NH 4 ) 2 MnBr 4 (H 2 O) 2 crystals
Source: Royal Society of Chemistry journal article supplement (doi:10.1039/d4tc03379e), 2024-11-18
Supplement: d4tc03379e1.pdf [file d4tc03379e1.pdf]

# Supporting Information

## Thermally Induced Reversible Phase Transition and Photoluminescence Switching Behavior of $(\text{NH}_4)_2\text{MnBr}_4(\text{H}_2\text{O})_2$ Crystals

Guanfeng Liu, ‡<sup>a</sup> Yaoyu Liu, ‡<sup>a</sup> Zongshuai Ji, <sup>a</sup> Tianyu Wang, <sup>a</sup> Shuai Zhang, <sup>a</sup> Bing Teng<sup>\*a,b,c</sup>, Shaohua Ji<sup>\*a,b,c</sup>

<sup>a</sup> College of Physics, Qingdao University, Ningxia Road No. 308, Qingdao 266071, China

<sup>b</sup> College of Physics, University-Industry Joint Center for Ocean Observation and Broadband Communication, Qingdao University, Qingdao 266071, China

<sup>c</sup> Qingdao Broadband Terahertz Spectroscopy Technology Engineering Research Center (Qingdao University), Qingdao 266071, China.

‡ G. L. and Y. L. contributed equally to this work.

**Corresponding Authors**

**Bing Teng**, E-mail: 5108tb@163.com

**Shaohua Ji**, E-mail: jesohua@163.com

|                 |                          |                                   |                          |
|-----------------|--------------------------|-----------------------------------|--------------------------|
| Bond precision: | Mn- O = 0.0150 Å         | Wavelength=0.71073                |                          |
| Cell:           | a=7.8991(11)<br>alpha=90 | b=7.8991(11)<br>beta=90           | c=8.5307(19)<br>gamma=90 |
| Temperature:    | 307 K                    |                                   |                          |
|                 | Calculated               | Reported                          |                          |
| Volume          | 532.28(19)               | 532.28(19)                        |                          |
| Space group     | I 4/m m m                | I 4/m m m                         |                          |
| Hall group      | -I 4 2                   | -I 4 2                            |                          |
| Moiety formula  | Br4 H4 Mn O2, H8 N2      | 2(Br2 H2 Mn0.5<br>O),0.25(H32 N8) |                          |
| Sum formula     | Br4 H12 Mn N2 O2         | Br4 H12 Mn N2 O2                  |                          |
| Mr              | 446.66                   | 446.70                            |                          |
| Dx,g cm-3       | 2.787                    | 2.787                             |                          |
| Z               | 2                        | 2                                 |                          |
| Mu (mm-1)       | 16.206                   | 16.206                            |                          |
| F000            | 414.0                    | 414.0                             |                          |
| F000'           | 412.87                   |                                   |                          |
| h,k,lmax        |                          | 11,9,11                           |                          |
| Nref            |                          | 236                               |                          |
| Tmin, Tmax      | 0.119,0.143              | 0.002,1.000                       |                          |
| Tmin'           | 0.090                    |                                   |                          |

**Table S1.** Coefficients of  $(\text{NH}_4)_2\text{MnBr}_4(\text{H}_2\text{O})_2$  Crystal Structure.

| Sample | N/(Atomic %) | Mn/(Atomic%) | Br/(Atomic%) | O/(Atomic %) |
|--------|--------------|--------------|--------------|--------------|
| 30 °C  | 23           | 8.67         | 39.69        | 28.64        |

**Table S2.** EDS analysis of  $(\text{NH}_4)_2\text{MnBr}_4(\text{H}_2\text{O})_2$  at 30 °C.

| Sample        | 50 mesh | 100 mesh | 200 mesh | 300 mesh |
|---------------|---------|----------|----------|----------|
| Heating time  | 32 s    | 27s      | 23s      | 18s      |
| Turn off time | 53 min  | 40 min   | 29 min   | 21 min   |

**Table S3.** The reversible luminescence response time of samples with different particle sizes tested under an air humidity of 40%.

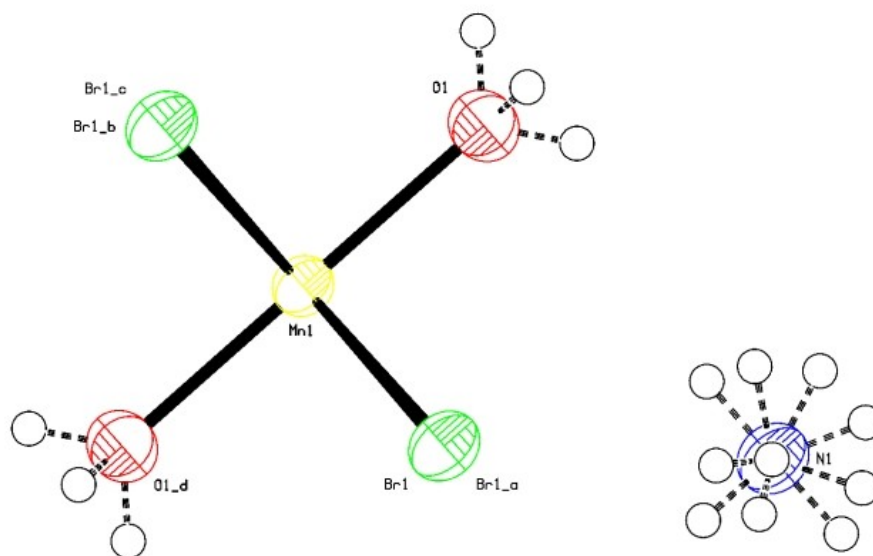

**Figure S1.** Schematic diagram of the disordered  $(\text{NH}_4)_2\text{MnBr}_4(\text{H}_2\text{O})_2$  crystal structure (H atoms have four sites but have no effect on the lattice parameters).

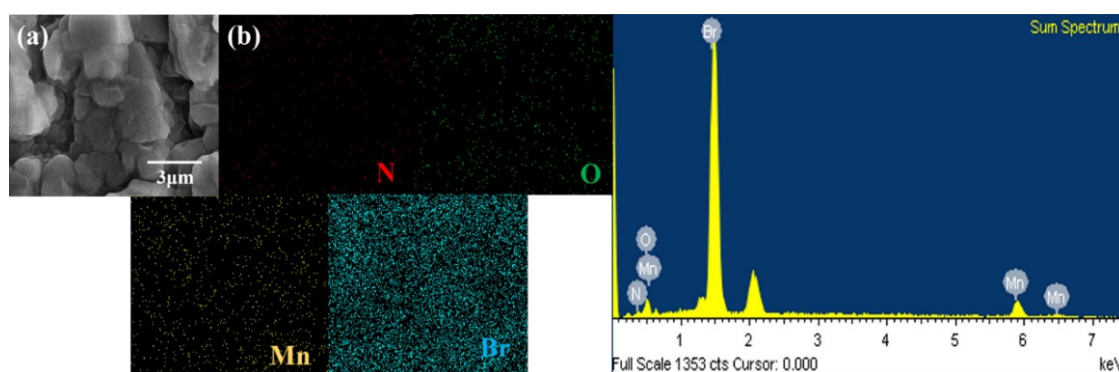

**Figure S2.** (a) SEM images and (b) EDS mapping of  $(\text{NH}_4)_2\text{MnBr}_4(\text{H}_2\text{O})_2$ .

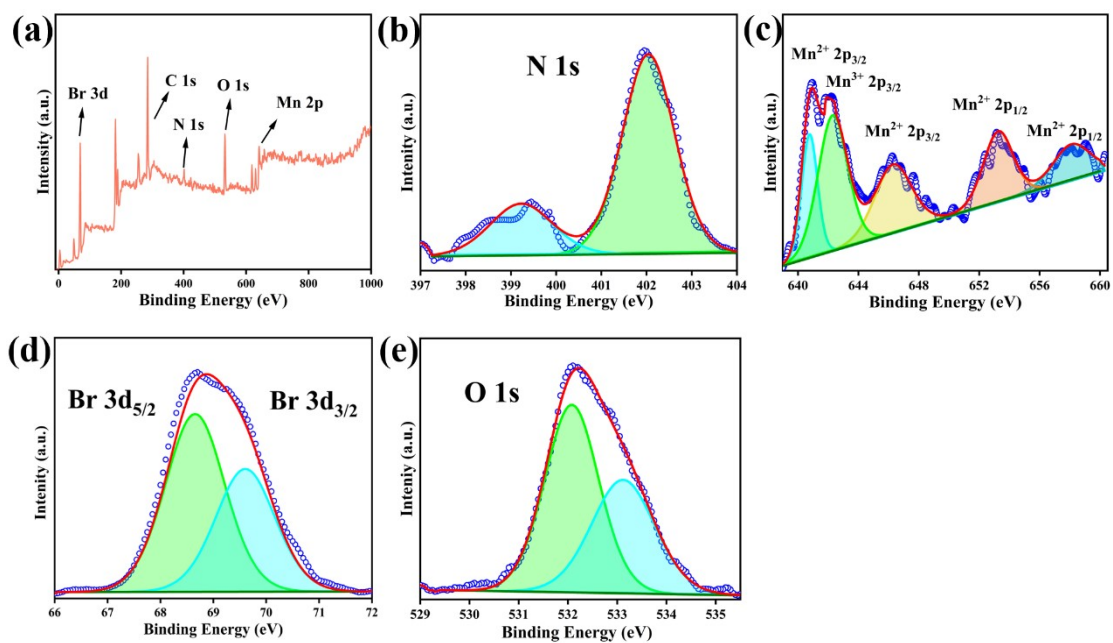

**Figure S3.** (a) XPS patterns of  $(\text{NH}_4)_2\text{MnBr}_4(\text{H}_2\text{O})_2$ . High-resolution spectra of (b) N 1s, (c) Mn 2p, (d) Br 3d and (e) O 1s.

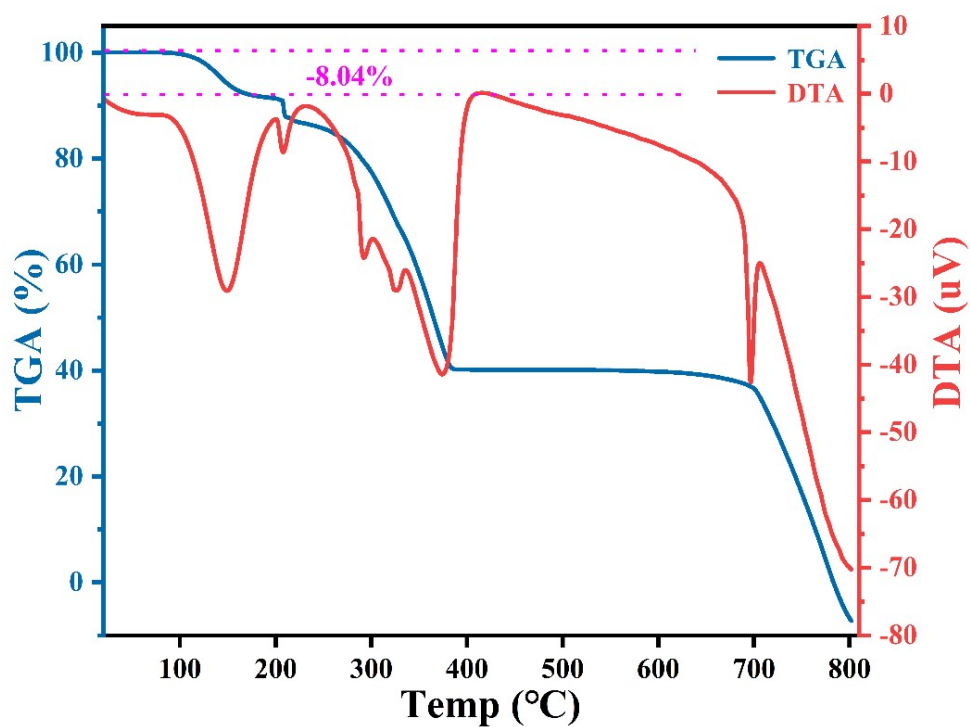

**Figure S4.** TGA and DTA of  $(\text{NH}_4)_2\text{MnBr}_4(\text{H}_2\text{O})_2$  powder.

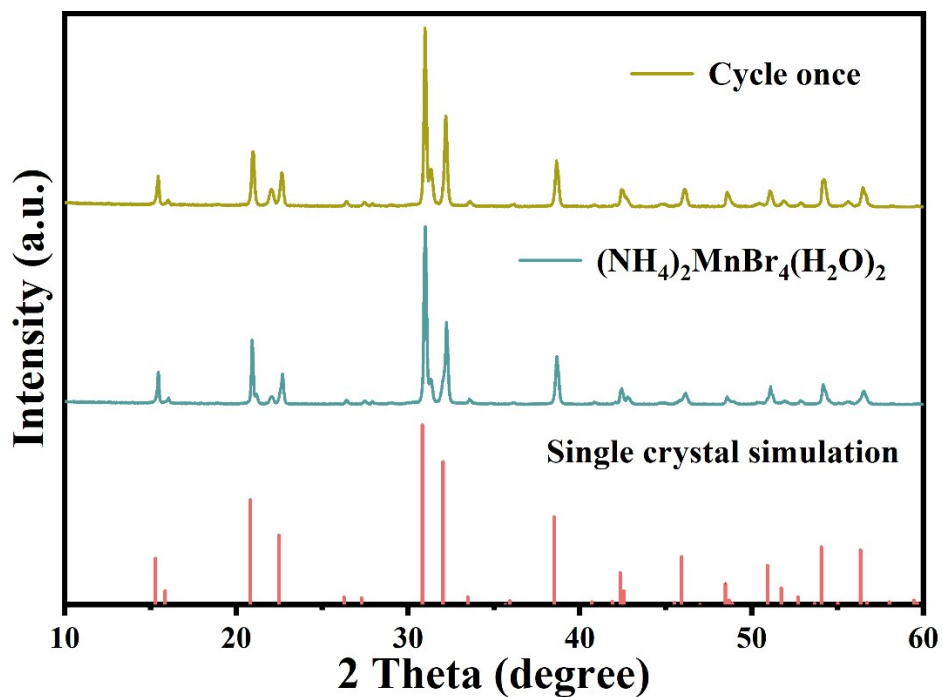

**Figure S5.** XRD patterns of pristine  $(\text{NH}_4)_2\text{MnBr}_4(\text{H}_2\text{O})_2$  and after one heating and cooling cycle.

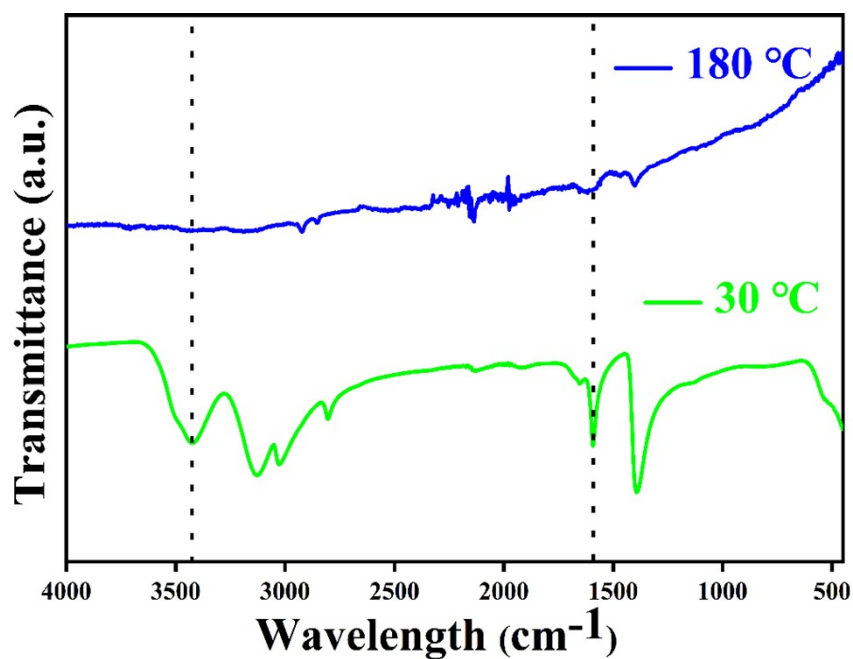

**Figure S6.** FT-IR spectra of  $(\text{NH}_4)_2\text{MnBr}_4(\text{H}_2\text{O})_2$  crystals with different temperature.

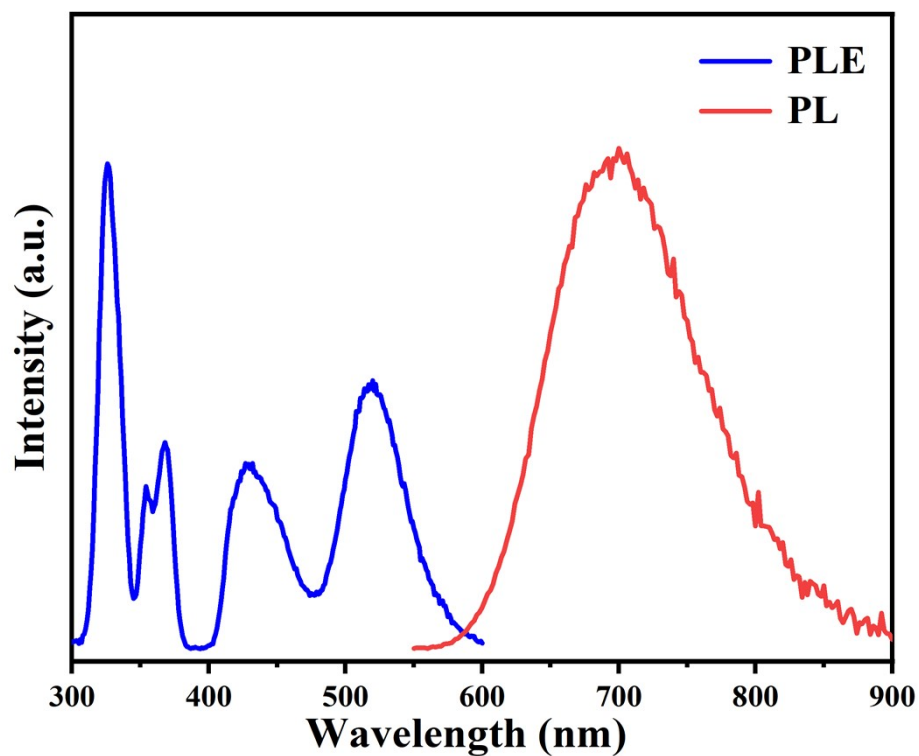

Figure S7. Excitation emission spectrum of  $(\text{NH}_4)_2\text{MnBr}_4(\text{H}_2\text{O})_2$  at room temperature.

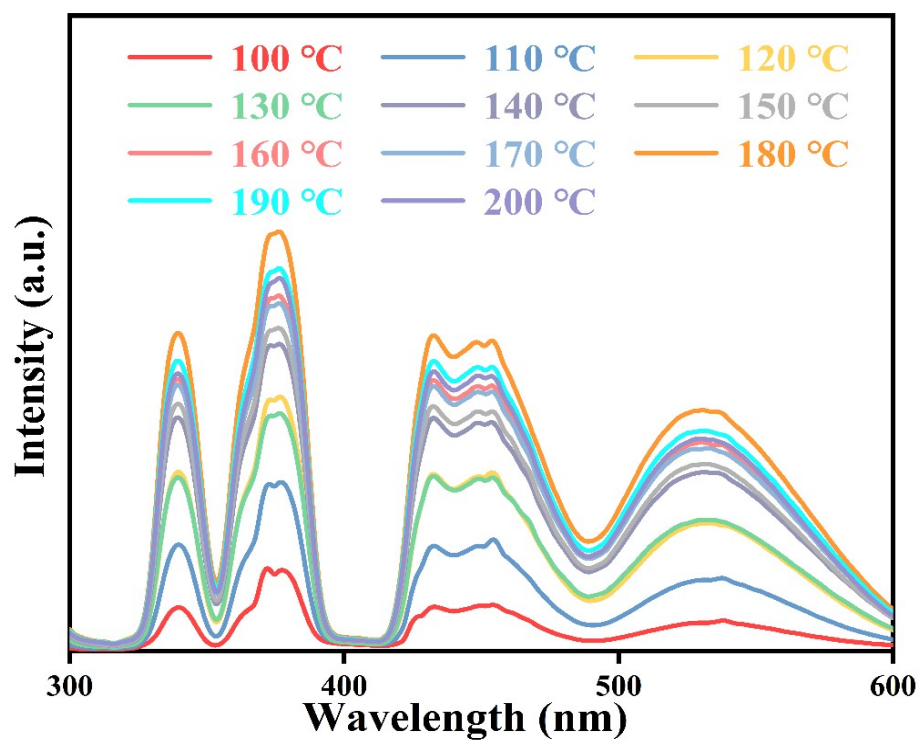

Figure S8. Temperature-dependent excitation spectrum of  $(\text{NH}_4)_2\text{MnBr}_4(\text{H}_2\text{O})_2$ .

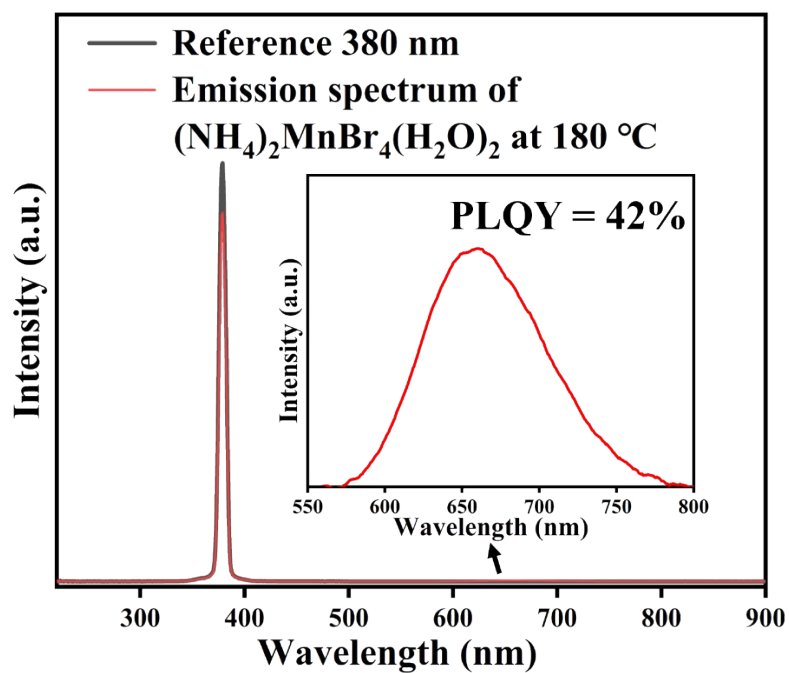

Figure S9. PLQY of  $(\text{NH}_4)_2\text{MnBr}_4(\text{H}_2\text{O})_2$  after heat treatment at 180 °C.

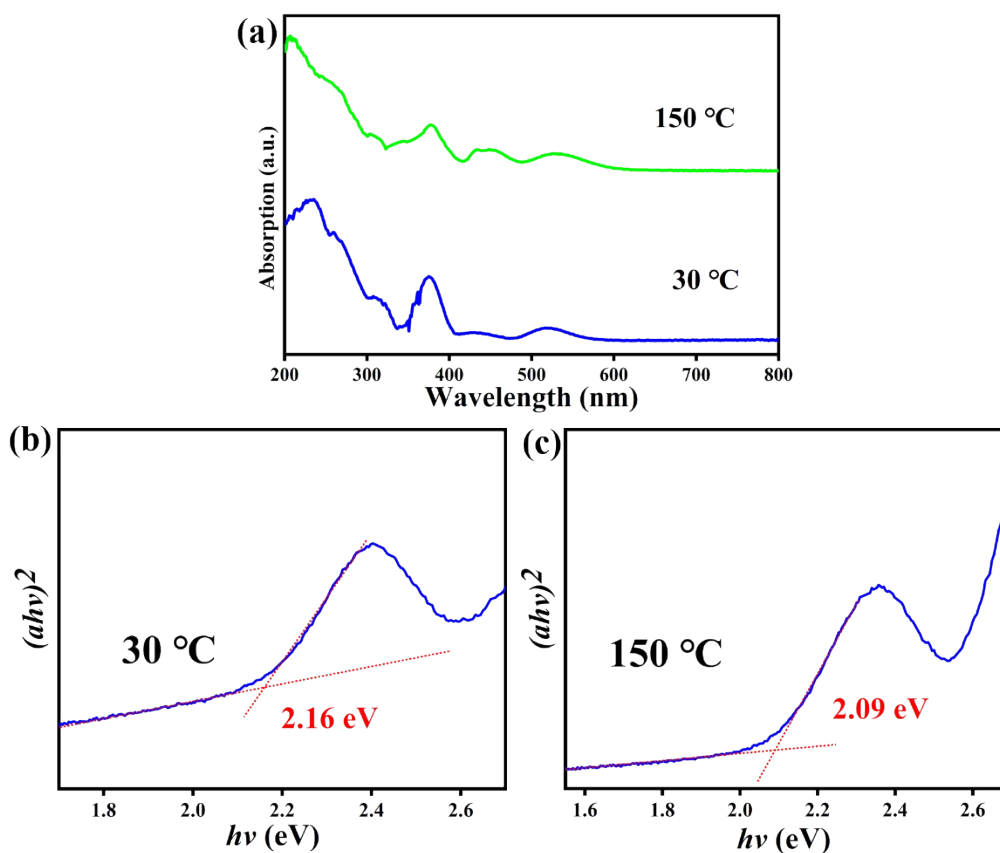

Figure S10. (a) Absorption spectra of  $(\text{NH}_4)_2\text{MnBr}_4(\text{H}_2\text{O})_2$  after heat treatment at 30 °C and 150 °C, the fitted band gap of  $(\text{NH}_4)_2\text{MnBr}_4(\text{H}_2\text{O})_2$  after heat treatment at (b) 30 °C and (c) 150 °C.

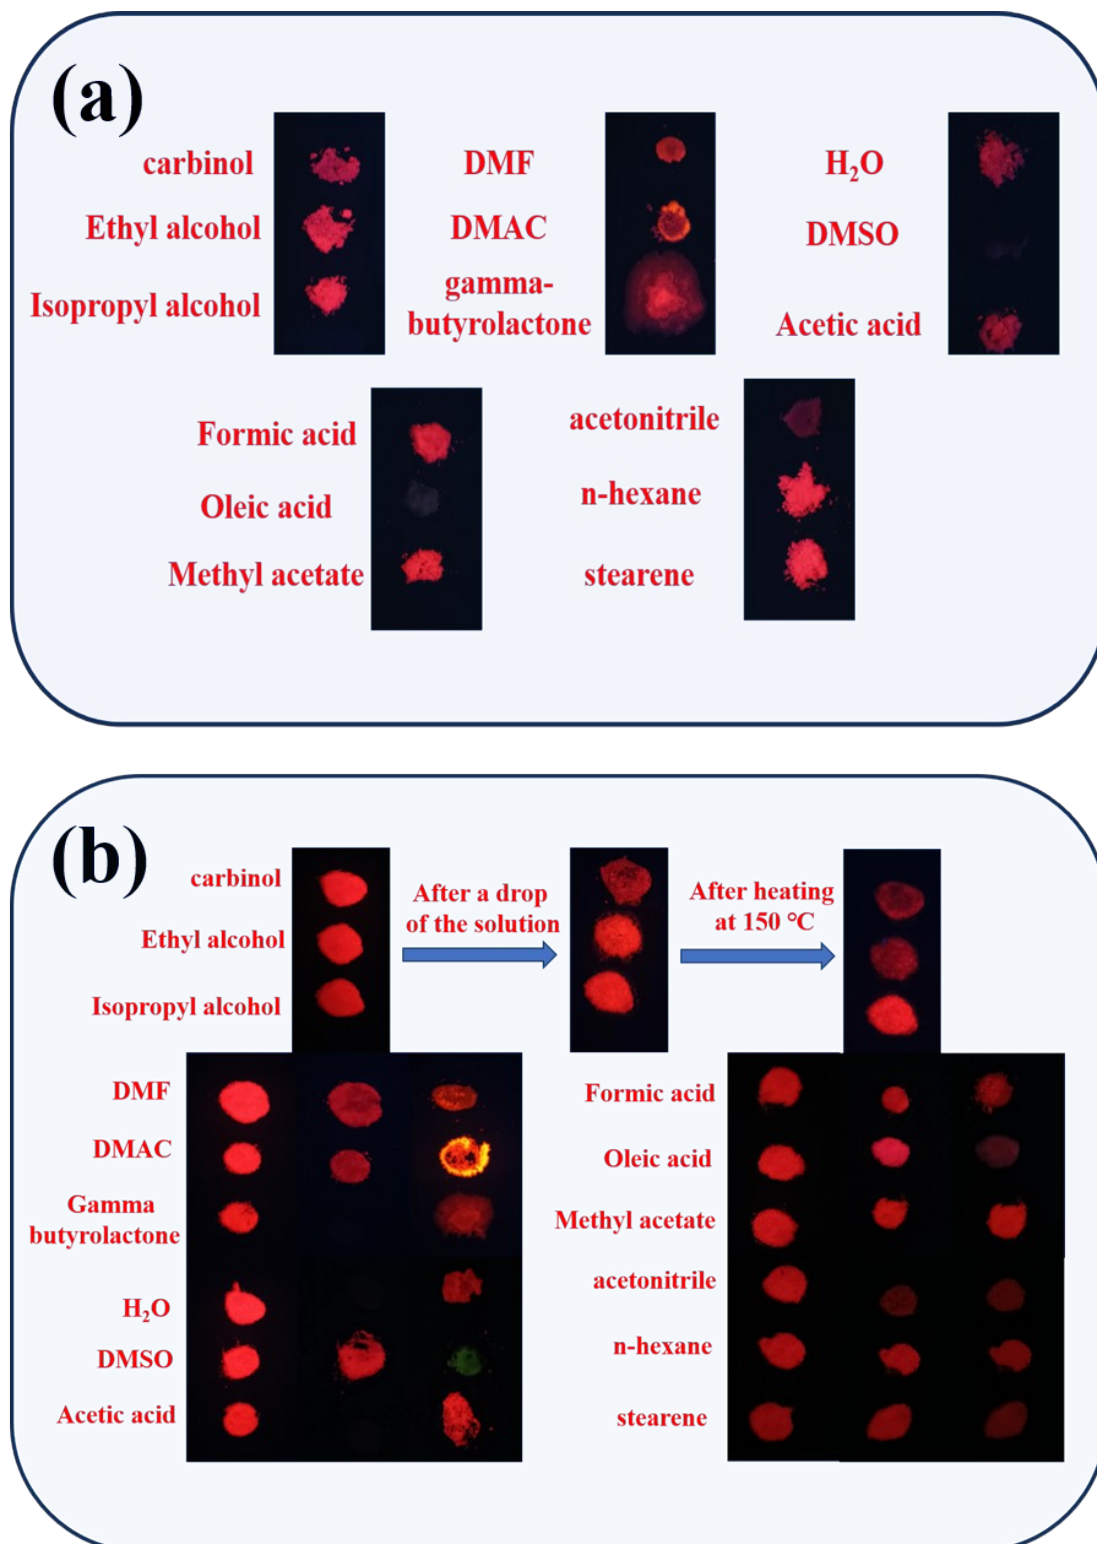

**Figure S11.** (a) First add the solvent dropwise, and then heat the  $(\text{NH}_4)_2\text{MnBr}_4(\text{H}_2\text{O})_2$  material. (b) After glowing, add solvent dropwise and heat again.



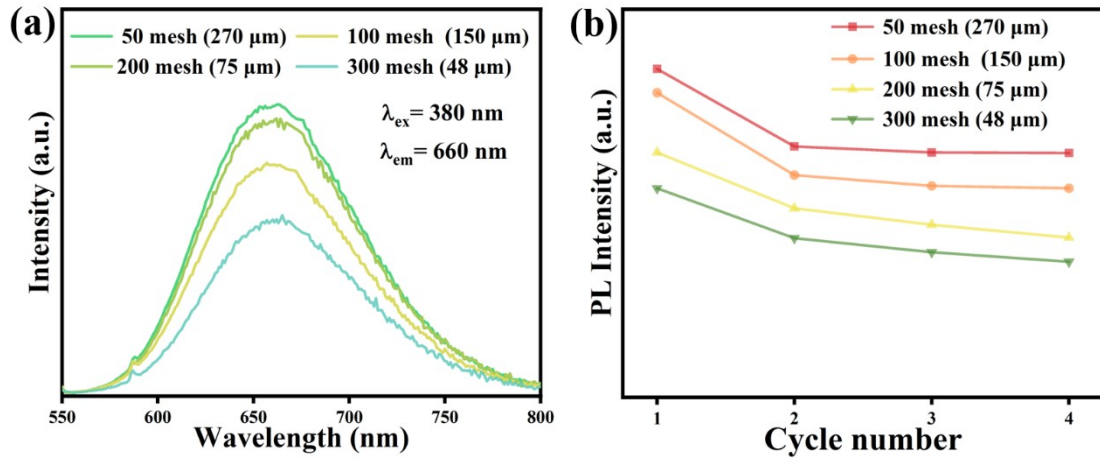

**Figure S12.** The samples were distinguished using meshes of different sizes. (a) PL intensity of samples with different particle sizes, (b) PL stability of different samples after four cycles.

**The Calculations of Tanabe-Sugano (T-S) Matrices.** The crystal field  $Dq$ , Racah B parameters and tree correction  $\alpha$  were obtained using the modified energy terms derived by Tanabe and Sugano as follows:

$$\Delta = 10Dq \quad (1)$$

$$6S \rightarrow {}^4A_1; {}^4E({}^4G) = 10B + 5C + 20\alpha \quad (2)$$

$$6S \rightarrow {}^4E({}^4D) = 17B + 5C + 6\alpha \quad (3)$$

$$6S \rightarrow {}^4T_2({}^4D) = 13B + 5C + 8\alpha \quad (4)$$

$$6S \rightarrow {}^4T_2({}^4G) = -10Dq + 18B + 6C - (26B^2/10Dq) + 22\alpha \quad (5)$$
